# Supplementary material
Source: publisher site journal article supplement (https://www.dovepress.com/article/220183)
Supplement: Supplementary file 1 [file get_supplementary_file.php]

**Supplementary Figure 1**. **The inclusion and exclusion process of the subjects.**


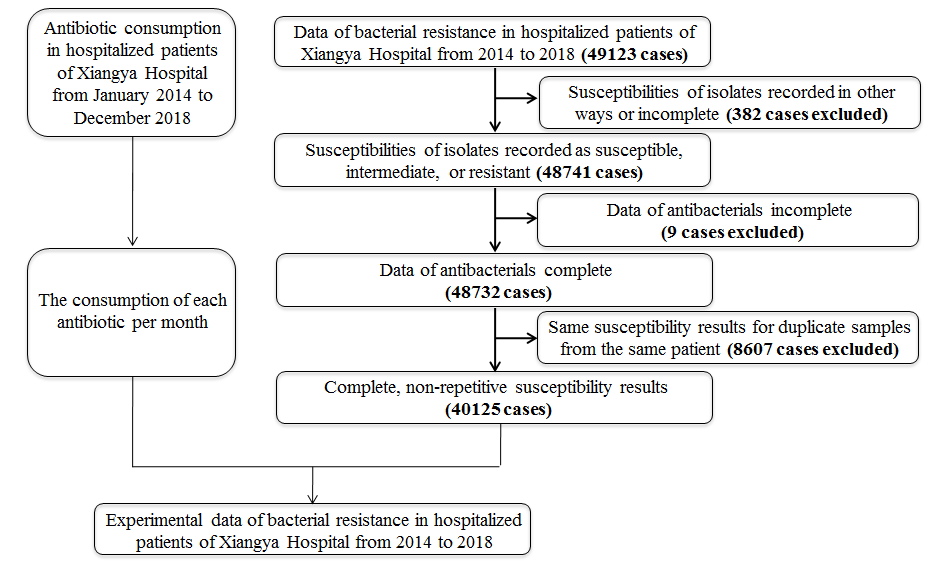


**Supplementary Table 1. Antibiotics consumption of top ten clinics in this tertiary comprehensive hospital during 2014–2018.**

| Department | Antimicrobial usage (AUD) by year | | | | | |
| --- | --- | --- | --- | --- | --- | --- |
| 2014 | 2015 | 2016 | 2017 | 2018 | Total |
| Hematology | 4.94 | 4.49 | 5.95 | 5.59 | 5.69 | 26.66 |
| Neurosurgery | 5.04 | 4.55 | 4.74 | 4.56 | 4.99 | 23.88 |
| Geriatrics | 3.43 | 3.21 | 3.07 | 3.00 | 2.82 | 15.53 |
| General surgery | 2.87 | 3.20 | 3.20 | 2.74 | 2.22 | 14.23 |
| Respiratory medicine | 2.97 | 3.07 | 2.81 | 2.13 | 2.38 | 13.36 |
| Pediatrics | 2.41 | 1.99 | 1.86 | 1.81 | 1.86 | 9.93 |
| Cardiothoracic surgery | 2.21 | 2.14 | 1.91 | 1.88 | 1.62 | 9.76 |
| Neurology | 2.04 | 1.86 | 2.05 | 1.84 | 1.64 | 9.43 |
| Infectious diseases | 1.84 | 1.96 | 1.85 | 1.61 | 1.67 | 8.93 |
| Urology surgery | 1.65 | 1.63 | 1.68 | 1.63 | 1.27 | 7.86 |

**Supplemental Table 2. Numbers and rank order of top ten isolated species in this tertiary comprehensive hospital during 2014–2018.**

| Organisms | 2014 | 2015 | 2016 | 2017 | 2018 |
| --- | --- | --- | --- | --- | --- |
| Total | 8017 | 8292 | 8501 | 8046 | 7269 |
| *E.coli* | 974(2) | 880(2) | 912(1) | 948(1) | 953(1) |
| *A.baumannii* | 1009(1) | 911(1) | 756(5) | 765(4) | 656(4) |
| *K.pneumonia* | 785(4) | 794(4) | 870(2) | 770(3) | 809(2) |
| *P.aeruginosa* | 861(3) | 749(5) | 767(4) | 765(4) | 716(3) |
| *C.albicans* | 428(6) | 808(3) | 780(3) | 845(2) | 440(6) |
| *S.aureus* | 562(5) | 588(6) | 609(6) | 483(6) | 533(5) |
| *S.epidermidis* | 245(9) | 273(7) | 314(7) | 269(7) | 275(7) |
| *E.faecium* | 304(7) | 272(8) | 290(8) | 248(9) | 242(9) |
| *E.faecalis* | 248(8) | 262(9) | 287(9) | 266(8) | 269(8) |
| *C.glabrata* | 168(12) | 226(11) | 214(10) | 241(10) | 163(10) |

**Supplementary Table 3. Antimicrobial resistance trends of top ten isolated species in this tertiary comprehensive hospital during 2014–2018.**

| Antimicrobial resistance for isolated species | | Resistant rate (%) | | | | | Linear regression | |
| --- | --- | --- | --- | --- | --- | --- | --- | --- |
| 2014 | 2015 | 2016 | 2017 | 2018 | Slope (*β*) | *P* |
| Total | | 32.54 | 32.29 | 31.44 | 29.28 | 26.45 | -1.52 | 0.02 |
| *E.coli* | Amikacin | 3.08 | 2.61 | 2.85 | 2.11 | 1.47 | -0.37 | 0.03 |
| Aztreonam | 50.77 | 48.29 | 44.52 | 42.62 | 35.02 | -3.72 | 0.01 |
| Trimethoprim  /sulfamethoxazole | 59.92 | 58.82 | 55.60 | 52.24 | 50.42 | -2.56 | 0.00 |
| Ciprofloxacin | 62.53 | 57.50 | 57.24 | 53.69 | 50.84 | -2.72 | 0.00 |
| Cefepime | 41.80 | 31.30 | 27.21 | 22.37 | 20.34 | -5.19 | 0.01 |
| Ceftriaxone | 71.22 | 69.51 | 64.58 | 64.87 | 55.68 | -3.57 | 0.02 |
| Tobramycin | 17.49 | 16.02 | 16.37 | 14.35 | 11.25 | -1.42 | 0.03 |
| Levofloxacin | 59.55 | 55.57 | 54.61 | 52.32 | 48.32 | -2.57 | 0.00 |
| *A.baumannii* | Aztreonam | 89.18 | 94.62 | 96.89 | 100.00 | 100.00 | 2.70 | 0.01 |
| Ciprofloxacin | 79.98 | 80.79 | 87.30 | 89.41 | 89.63 | 2.79 | 0.02 |
| Gentamycin | 74.53 | 77.61 | 81.48 | 85.10 | 84.60 | 2.76 | 0.01 |
| Cefepime | 81.39 | 82.46 | 87.70 | 89.28 | 89.33 | 2.27 | 0.02 |
| Ceftriaxone | 82.16 | 83.10 | 88.23 | 89.15 | 89.33 | 2.04 | 0.02 |
| Imipenem | 79.96 | 80.90 | 86.64 | 88.85 | 88.11 | 2.43 | 0.03 |
| *K.pneumonia* | Cefoxitin | 25.34 | 31.20 | 45.79 | 71.43 | 100.00 | 18.96 | 0.01 |
| *P.aeruginosa* | Ampicillin  /sulbactam | 99.76 | 99.73 | 99.87 | 100.00 | 100.00 | 0.07 | 0.02 |
| Gentamycin | 30.30 | 17.91 | 20.47 | 13.73 | 10.89 | -4.30 | 0.03 |
| Ceftazidime | 36.60 | 27.14 | 29.16 | 25.92 | 22.05 | -3.03 | 0.04 |
| Tobramycin | 31.82 | 18.42 | 19.95 | 12.58 | 10.08 | -4.93 | 0.03 |
| *C.albicans* | Fluconazole | 12.59 | 4.95 | 3.33 | 0.95 | 0.91 | -2.74 | 0.04 |
| *S.aureus* | Rifampicin | 18.86 | 12.10 | 8.06 | 5.59 | 7.32 | -2.96 | 0.05 |
| Gentamycin | 26.69 | 17.55 | 16.09 | 11.39 | 12.95 | -3.36 | 0.04 |
| Tetracycline | 42.65 | 39.52 | 35.86 | 34.37 | 30.39 | -2.97 | 0.00 |
| *S.epidermidis* | Tetracycline | 31.43 | 30.15 | 29.30 | 24.91 | 19.64 | -2.88 | 0.02 |
| *E.faecium* | Ampicillin | 74.26 | 77.21 | 88.28 | 90.69 | 93.78 | 5.25 | 0.01 |
| Ciprofloxacin | 77.11 | 77.57 | 84.83 | 85.48 | 88.11 | 2.99 | 0.01 |
| Ceftriaxone | 98.96 | 99.48 | 100.00 | 100.00 | 100.00 | 0.26 | 0.05 |
| Levofloxacin | 71.96 | 74.74 | 80.69 | 84.27 | 87.18 | 4.00 | 0.00 |

Note: Listing isolated species only with significantly difference.

**Supplementary Table 4. The association between antibacterial resistance rates and usage in this tertiary comprehensive hospital during 2014–2018.**

| Dependent variable  (antimicrobial resistance for isolated species) | | Independent variable  (correlative usage of antimicrobial agents) | Slope (*β*) | *P* |
| --- | --- | --- | --- | --- |
| *E.coli* | Ampicillin | Penicillins (J01CA+J01CE+J01CF) | 8.81 | 0.96 |
| Aztreonam | Monobactams (J01DF) | 18.67 | 0.35 |
| Nitrofurantoin | Nitrofuran derivatives (J01XE) | 8.87 | 0.96 |
| Trimethoprim  /sulfamethoxazole | Sulfonamides and trimethoprim (J01E) | 26.20 | 0.10 |
| Ciprofloxacin | Quinolones (J01M) | 10.68 | 0.83 |
| Piperacillin/tazobactam | Combinations of penicillins, incl. beta-lactamase inhibitors (J01CR) | 14.64 | 0.69 |
| Gentamycin | Aminoglycosides (J01G) | 22.18 | 0.22 |
| Cefepime | Fourth-generation cephalosporins (J01DE) | 17.58 | 0.35 |
| Ceftriaxone | Third-generation cephalosporins (J01DD) | 15.01 | 0.52 |
| Ceftazidime | Third-generation cephalosporins (J01DD) | 17.41 | 0.43 |
| Cefotetan | Second-generation cephalosporins (J01DC) | 13.71 | 0.75 |
| Cefazolin | First-generation cephalosporins (J01DB) | 22.44 | 0.17 |
| Tobramycin | Aminoglycosides (J01G) | 19.10 | 0.39 |
| *A.baumannii* | Ampicillin | Penicillins (J01CA+J01CE+J01CF) | 25.54 | 0.11 |
| Trimethoprim  /sulfamethoxazole | Sulfonamides and trimethoprim (J01E) | 15.25 | 0.58 |
| Ciprofloxacin | Quinolones (J01M) | 1.56 | 0.08* |
| Gentamycin | Aminoglycosides (J01G) | -4.55 | 0.50* |
| Cefepime | Fourth-generation cephalosporins (J01DE) | 19.97 | 0.28 |
| Ceftriaxone | Third-generation cephalosporins (J01DD) | 19.62 | 0.29 |
| Tobramycin | Aminoglycosides (J01G) | 23.61 | 0.13 |
| Imipenem | Carbapenems (J01DH) | 32.87 | 0.01 |
| Levofloxacin | Quinolones (J01M) | 1.42 | 0.22* |
| *K.pneumonia* | Amikacin | Aminoglycosides (J01G) | 15.84 | 0.54 |
| Aztreonam | Monobactams (J01DF) | 12.74 | 0.75 |
| Nitrofurantoin | Nitrofuran derivatives (J01XE) | 22.94 | 0.15 |
| Trimethoprim  /sulfamethoxazole | Sulfonamides and trimethoprim (J01E) | 16.03 | 0.45 |
| Ciprofloxacin | Quinolones (J01M) | 20.50 | 0.25 |
| Piperacillin/tazobactam | Combinations of penicillins, incl. beta-lactamase inhibitors (J01CR) | 18.11 | 0.38 |
| Gentamycin | Aminoglycosides (J01G) | 14.03 | 0.60 |
| Cefepime | Fourth-generation cephalosporins (J01DE) | -1.38 | 0.12* |
| Ceftriaxone | Third-generation cephalosporins (J01DD) | 12.90 | 0.80 |
| Ceftazidime | Third-generation cephalosporins (J01DD) | 0.12 | 0.82* |
| Cefotetan | Second-generation cephalosporins (J01DC) | 8.08 | 0.95 |
| Cefazolin | First-generation cephalosporins (J01DB) | 7.82 | 0.95 |
| Tobramycin | Aminoglycosides (J01G) | 21.34 | 0.17 |
| Imipenem | Carbapenems (J01DH) | 16.59 | 0.48 |
| Levofloxacin | Quinolones (J01M) | 16.25 | 0.51 |
| *P.aeruginosa* | Amikacin | Aminoglycosides (J01G) | 13.17 | 0.72 |
| Ciprofloxacin | Quinolones (J01M) | 23.78 | 0.13 |
| Piperacillin/tazobactam | Combinations of penicillins, incl. beta-lactamase inhibitors (J01CR) | 22.69 | 0.16 |
| Gentamycin | Aminoglycosides (J01G) | 10.82 | 0.87 |
| Cefepime | Fourth-generation cephalosporins (J01DE) | 13.21 | 0.72 |
| Ceftazidime | Third-generation cephalosporins (J01DD) | 10.73 | 0.87 |
| Tobramycin | Aminoglycosides (J01G) | 14.23 | 0.65 |
| Levofloxacin | Quinolones (J01M) | 20.39 | 0.25 |
| *S.aureus* | Oxacillin | Penicillins (J01CA+J01CE+J01CF) | 10.36 | 0.89 |
| Trimethoprim  /sulfamethoxazole | Sulfonamides and trimethoprim (J01E) | 11.08 | 0.89 |
| Erythromycin | Macrolides (J01FA) | 7.77 | 0.98 |
| Ciprofloxacin | Quinolones (J01M) | 23.54 | 0.17 |
| Clindamycin | Lincosamides (J01FF) | 9.17 | 0.96 |
| Moxifloxacin | Quinolones (J01M) | 13.12 | 0.78 |
| Gentamycin | Aminoglycosides (J01G) | 14.60 | 0.62 |
| Tetracycline | Tetracyclines (J01AA) | 22.86 | 0.15 |
| Levofloxacin | Quinolones (J01M) | 24.78 | 0.13 |
| *S.epidermidis* | Oxacillin | Penicillins (J01CA+J01CE+J01CF) | 14.42 | 0.70 |
| Trimethoprim  /sulfamethoxazole | Sulfonamides and trimethoprim (J01E) | 12.53 | 0.82 |
| Erythromycin | Macrolides (J01FA) | 12.89 | 0.80 |
| Ciprofloxacin | Quinolones (J01M) | 18.45 | 0.43 |
| Clindamycin | Lincosamides (J01FF) | 11.74 | 0.86 |
| Moxifloxacin | Quinolones (J01M) | 21.75 | 0.19 |
| Gentamycin | Aminoglycosides (J01G) | 16.86 | 0.53 |
| Tetracycline | Tetracyclines (J01AA) | 10.89 | 0.90 |
| Levofloxacin | Quinolones (J01M) | 21.93 | 0.23 |
| *E.faecium* | Nitrofurantoin | Nitrofuran derivatives (J01XE) | 10.29 | 0.89 |
| High concentration streptomycin | Aminoglycosides (J01G) | 12.55 | 0.82 |
| High concentration gentamycin | Aminoglycosides (J01G) | 9.75 | 0.91 |
| Erythromycin | Macrolides (J01FA) | 10.61 | 0.91 |
| Ciprofloxacin | Quinolones (J01M) | 14.19 | 0.65 |
| Moxifloxacin | Quinolones (J01M) | 26.45 | 0.09 |
| Tetracycline | Tetracyclines (J01AA) | 8.90 | 0.96 |
| Levofloxacin | Quinolones (J01M) | 104.40 | 0.00 |
| *E.faecalis* | High concentration gentamycin | Aminoglycosides (J01G) | 20.10 | 0.27 |
| Erythromycin | Macrolides (J01FA) | 12.96 | 0.74 |
| Ciprofloxacin | Quinolones (J01M) | 13.12 | 0.73 |
| Tetracycline | Tetracyclines (J01AA) | 23.54 | 0.17 |
| Levofloxacin | Quinolones (J01M) | 26.05 | 0.10 |

Note: *Double checked by linear regression.
